# Supplementary material for: Efficient markerless integration of genes in the chromosome of probiotic E. coli Nissle 1917 by bacterial conjugation
Source: PubMed Central journal article supplement — Microb Biotechnol. 2021 Nov 9;15(5):1374–91. doi: 10.1111/1751-7915.13967 (PMC9049610; doi:10.1111/1751-7915.13967), 2021-11-09
Supplement: MBT2-15-1374-s001.pdf [file MBT2-15-1374-s001.pdf]

## Supporting Information

### Efficient markerless integration of genes in the chromosome of probiotic *E. coli* Nissle 1917 by bacterial conjugation

Elena M. Seco<sup>1</sup> and Luis Ángel Fernández<sup>1\*</sup>

<sup>1</sup>Department of Microbial Biotechnology, Centro Nacional de Biotecnología, Consejo Superior de Investigaciones Científicas (CNB-CSIC), Darwin 3, Campus UAM Cantoblanco, 28049 Madrid, Spain.

(\*) For correspondence: [lafdez@cnb.csic.es](mailto:lafdez@cnb.csic.es)

This file includes:

- Tables S1 and S2.
- Supporting Experimental Procedures.
- Supporting References.
- Figures S1 to S8.

**Table S1. *E. coli* strains and plasmids used in this study**

| <b>Name</b>                                                                                     | <b>Genotype and relevant properties</b>                                                                                                                                                                                                                                                                 | <b>Reference</b>                |
|-------------------------------------------------------------------------------------------------|---------------------------------------------------------------------------------------------------------------------------------------------------------------------------------------------------------------------------------------------------------------------------------------------------------|---------------------------------|
| <b>MFDpir</b>                                                                                   | MG1655 RP4-2-Tc::[Mu1::aac(3)IV- $\Delta$ aphA- $\Delta$ nic35- $\Delta$ Mu2::zeo] $\Delta$ dapA::<br>( <i>erm-pir</i> ) $\Delta$ recA                                                                                                                                                                  | (Ferrières, et al., 2010)       |
| <b>BW25141</b>                                                                                  | (F- $\lambda$ -) $\Delta$ ( <i>araD-araB</i> )567, $\Delta$ lacZ4787(:: <i>rmB</i> -3), $\Delta$ ( <i>phoB phoR</i> )580, <i>galU</i> 95, $\Delta$ <i>uidA</i> 3:: <i>pir</i> ,<br><i>recA</i> 1, <i>endA</i> 9( <i>del-ins</i> )::FRT, <i>rph</i> -1, $\Delta$ ( <i>rhaD-rhaB</i> )568, <i>hsdR</i> 51 | (Datsenko and Wanner, 2000)     |
| <b><i>E. coli</i> Nissle 1917 (EcN)</b>                                                         | Serotype O6:K5:H1                                                                                                                                                                                                                                                                                       | DSM6601/Mutaflor                |
| <b>EcN_pACBSR</b>                                                                               | EcN transformed with pACBSR (Cm <sup>R</sup> )                                                                                                                                                                                                                                                          | This work                       |
| <b>EcN_pACBS</b>                                                                                | EcN transformed with pACBS (Cm <sup>R</sup> )                                                                                                                                                                                                                                                           | This work                       |
| <b>EcN_pACBSG</b>                                                                               | EcN transformed with pACBSG (Cm <sup>R</sup> )                                                                                                                                                                                                                                                          | This work                       |
| <b>EcN<math>\Delta</math>flu_gfp</b>                                                            | EcN $\Delta$ flu::Ptac- <i>gfp</i>                                                                                                                                                                                                                                                                      | This work                       |
| <b>EcN<math>\Delta</math>fim_gfp</b>                                                            | EcN $\Delta$ fimAICDFGH::Ptac- <i>gfp</i>                                                                                                                                                                                                                                                               | This work                       |
| <b>EcN<math>\Delta</math>fim_mKATE2</b>                                                         | EcN $\Delta$ fimAICDFGH::Ptac- <i>mKATE</i>                                                                                                                                                                                                                                                             | This work                       |
| <b>EcN<math>\Delta</math>mat_lux</b>                                                            | EcN $\Delta$ ecpA::P <sub>2</sub> - <i>luxCDABE</i>                                                                                                                                                                                                                                                     | This work                       |
| <b>EcN_P<sub>tet</sub>-<i>flhDC</i></b>                                                         | EcN <i>tetR</i> -Ptet- <i>flhDC</i>                                                                                                                                                                                                                                                                     | This work                       |
| <b>EcN<math>\Delta</math>flhDC</b>                                                              | EcN $\Delta$ flhDC                                                                                                                                                                                                                                                                                      | This work                       |
| <b>EcN<math>\Delta</math>fim_mKATE2 <math>\Delta</math>mat_lux</b>                              | EcN $\Delta$ fimAICDFGH::Ptac- <i>mKATE2</i> $\Delta$ ecpA::P <sub>2</sub> - <i>luxCDABE</i>                                                                                                                                                                                                            | This work                       |
| <b>EcN<math>\Delta</math>fim_mKATE2 <math>\Delta</math>mat_lux P<sub>tet</sub>-<i>flhDC</i></b> | EcN TetR_Ptet- <i>flhDC</i> $\Delta$ fim::Ptac- <i>mKATE2</i> $\Delta$ matB:: P <sub>2</sub> - <i>luxCDABE</i>                                                                                                                                                                                          | This work                       |
| <b>pSEVA237R</b>                                                                                | Km <sup>R</sup> , pBBR1-ori, <i>oriT</i> , mCherry                                                                                                                                                                                                                                                      | (Martinez-Garcia, et al., 2015) |
| <b>pSEVA241</b>                                                                                 | Km <sup>R</sup> , pRO1600/ColE1, <i>oriT</i>                                                                                                                                                                                                                                                            | (Martinez-Garcia, et al., 2015) |
| <b>pGE</b>                                                                                      | Km <sup>R</sup> , R6K-ori, polylinker flanked by two I-SceI restriction sites                                                                                                                                                                                                                           | (Piñero-Lambea, et al., 2015)   |
| <b>pGEC</b>                                                                                     | Km <sup>R</sup> , <i>oriT</i> , R6K-ori, polylinker flanked by two I-SceI restriction sites                                                                                                                                                                                                             | This work                       |
| <b>pACBSR</b>                                                                                   | p15A-ori, Cm <sup>R</sup> , P <sub>BAD</sub> promoter, I-SceI endonuclease and $\lambda$ Red genes                                                                                                                                                                                                      | (Herring, et al., 2003)         |
| <b>pACBS</b>                                                                                    | p15A-ori, Cm <sup>R</sup> , P <sub>BAD</sub> promoter, I-SceI endonuclease                                                                                                                                                                                                                              | This work                       |
| <b>pACBSG</b>                                                                                   | p15A-ori, Cm <sup>R</sup> , P <sub>BAD</sub> promoter, I-SceI endonuclease and $\lambda$ Red <i>gam</i>                                                                                                                                                                                                 | This work                       |
| <b>pGECfluEcN_gfp</b>                                                                           | pGEC derivative; Ptac- <i>gfp</i> <sup>TCD</sup> with homology regions of the EcN <i>flu</i> gene                                                                                                                                                                                                       | This work                       |
| <b>pGECfimEcN_gfp</b>                                                                           | pGEC derivative; Ptac- <i>gfp</i> <sup>TCD</sup> with homology regions flanking the EcN <i>fimEAICDFGH</i>                                                                                                                                                                                              | This work                       |
| <b>pGECfimEcN_mKATE2</b>                                                                        | pGEC derivative; Ptac- <i>mKATE2</i> with homology regions flanking the <i>fimEAICDFGH</i>                                                                                                                                                                                                              | This work                       |
| <b>pGECmatEcN_lux</b>                                                                           | pGEC derivative; P <sub>2</sub> - <i>luxCDABE</i> with homology regions flanking EcN <i>ecpA</i>                                                                                                                                                                                                        | This work                       |
| <b>pGEC_tetR-Ptet-<i>flhDC</i>'</b>                                                             | pGEC derivative; TetR_Ptet- <i>flhDC</i> with homology regions for replacing natural EcN<br><i>flhDC</i> promoter (2104116-2103813 bases from CP007799.1) by TetR_Ptet.                                                                                                                                 | This work                       |
| <b>pGEC<math>\Delta</math>flhDC</b>                                                             | pGEC derivative with homology regions flanking EcN <i>flhDC</i> (2104116-2102879 bases<br>from CP007799.1)                                                                                                                                                                                              | This work                       |

**Table S2. Oligonucleotides used as primers in this work**

| Number | Nucleotide sequence (5'-3')                              |
|--------|----------------------------------------------------------|
| 1      | GCTAATAATAACTCCTGTTAGCAAC                                |
| 2      | GTCAGTTTGCCGTACGTGGCGTC                                  |
| 3      | CGGCGACGGTCCGGTTTTGCTGCC                                 |
| 4      | CCGGCAGTTTCATGAGAATCAGAC                                 |
| 5      | TCATCCGCACATGTTACGCCATTC                                 |
| 6      | GTGATGAACGCTTTTGAAAGTGCG                                 |
| 7      | AGACCCGTACATAAAGCTCGTTGC                                 |
| 8      | AAGGATCCATTAAGAGGAGAAATACTAGATGATGTCAGAATTAATTAAGAAAATAT |
| 9      | CTGAATGTACCTGTAAAAATTACAG                                |
| 10     | GCTTAGCCATTTCTTCTGAATATC                                 |
| 11     | GATGAAATGCAGCGTAAACATGTTC                                |
| 12     | CCGTCTTTGTTATCCGCCGTGTC                                  |
| 13     | GCTAATTGATTGTACATTTCC                                    |
| 14     | AAAAACAACCTAAATGTGAAAGTGG                                |
| 15     | GTTGTTAAACCTTCGATTCCGACC                                 |
| 16     | CTGTTCAAGGTATAAACGGTAG                                   |
| 17     | CCCCATTACAGCCGCAACAATAC                                  |
| 18     | GCGCCTCGAGACCGGGTAGGGATAACAGGGTAATCCATGTCAGCCGTTAAGTGTC  |
| 19     | GCGCGCGCGCCGTCTTTTCCGCTGCATAACCCTGCTTCGG                 |
| 20     | GGTCTCGAGATGAAACGACATCTGAATAC                            |
| 21     | TCAACAGCTCATTTCAGAAGAGCTCCGGCAGCTTTCCCTCCCCCGTGTA        |
| 22     | TACACGGGGGAGGGAAAGCTGCCGGAGCTCTTCTGAAATGAGCTGTTGA        |
| 23     | GTTGTCACTGATACTGAATGGCAGACACTAGTTTACTTATACAGTTTCATC      |
| 24     | GATGAACTGTATAAGTAACTAGTGTCTGCCATTCAGTATCACTGACAAC        |
| 25     | GCGCGCATGCCAGAAGGTCACATTCAGCGTGGC                        |
| 26     | GTCTCGAGGGATAGAGCCAGAGGACGACAGC                          |
| 27     | TCAACAGCTCATTTCAGAAGAGCTCAATAGTAGTACTCCTAACTGAGAT        |
| 28     | ATCTCAGTTAGGAGTACTACTATTGAGCTCTTCTGAAATGAGCTGTTGA        |
| 29     | CATTAGCAATGTTCTGTGATTTCTACTAGTTTACTTATACAGTTTCATC        |
| 30     | GATGAACTGTATAAGTAACTAGTAGAAATCACAGAACATTGCTAATG          |
| 31     | GCGCGCATGCATTATGGCATGGCTGATCACTGTG                       |
| 32     | ATACACTAGTTTATCAACGATGTCCTAATTTGACGGAAGGTC               |
| 33     | GCGCCTCGAGCTGGAGAAAATCAGAAAAGATTT                        |
| 34     | GCGCGAGCTCGCTTTTCTTCCCGAGTTGAATTGAG                      |
| 35     | GCGACTAGTCAGGGGTACCCCCCTGCTTTATTC                        |
| 36     | GCGGCATGCGGCGTACTGAAAGTGGTAGTTCGC                        |
| 37     | GGTCTCGAGTGTTCTTATTCTGTGAACTTCAG                         |
| 38     | GCGCGAGCTCGTATAAGTCATACTTTTGTGTTTGG                      |
| 39     | GTGATCTAGAAAGAAGGAGATATACATATGCATACCTCCGAGTTGCTGAAACA    |
| 40     | GCGCGCATGCCCTTTCCGGCGGTGGGCTTCCGCG                       |
| 41     | GCGCGAGCTCGATAACGGTGTGGCGAAACATTCCAG                     |
| 42     | GCGCGCATGCGATAAATTCAAGCATGACGCTATC                       |
| 43     | CTATGCCATAGCATTATCCATA                                   |
| 44     | GCGCGCATGCTTATACCTCTGAATCAATATCAAC                       |

\* Restriction site is underlined above the oligonucleotide sequence

## Supporting Experimental Procedures

### Plasmids constructions

**pACBS:** Plasmid for cointegrants resolution constructed by deleting the *SphI* fragment containing the  $\lambda$  Red genes from plasmid pACBSR.

**pACBSG:** Plasmid for cointegrants resolution constructed by cloning a DNA fragment obtained by PCR from pACBSR with oligonucleotides **43** and **44**, digested with *BamHI-SphI* and cloned into the same sites of pACBS.

**pGEC:** GeneBank MZ361915. This suicide plasmid is a pGE-derivative (Piñero-Lambea, et al., 2015) (GeneBank MZ361922) containing a 680-bp DNA fragment corresponding to the *oriT* and R6K, amplified by PCR from plasmid pSEVA412S (Martinez-Garcia, et al., 2015) with the oligonucleotides **18** and **19**, digested with *XhoI-AscI* and cloned into the same sites of pGE.

**pGECfluEcN\_gfp:** GenBank MZ361916. It is a pGEC-derivative containing a DNA fragment as a fusion PCR product of three individual PCRs: (i) homologous region HR1-flu, amplified from EcN total DNA with oligonucleotides **20** and **21**; (ii) Ptac-gfp, containing *gfp*<sup>TCO</sup> allele (Corcoran, et al., 2010), was amplified from pGEfluPtac-gfp (Ruano-Gallego, et al., 2015) with oligonucleotides **22** and **23**; (iii) homologous region HR2-flu, amplified from EcN total DNA with oligonucleotides **24** and **25**. Fusion PCR was digested with *XhoI-SphI* and cloned into the same sites of pGEC.

**pGECfimEcN\_gfp:** GeneBank MZ361917. It is a pGEC-derivative containing a DNA fragment obtained as a fusion PCR product of three individual PCRs: (i) the homologous region HR1-*fim*, amplified from EcN total DNA with oligonucleotides **26** and **27**; (ii) Ptac-gfp, amplified from pGEfluPtac-gfp (Ruano-Gallego, et al., 2015) with oligonucleotides **28** and **29**; (iii) the homologous region HR2-*fim*, amplified from EcN total DNA with oligonucleotides **30** and **31**. The fusion PCR was digested with *XhoI-SphI* and cloned into the same sites of pGEC.

**pGECfimEcN\_mKATE2:** GeneBank MZ361918. It is a pGEC-derivative containing a DNA fragment encoding the fluorescent protein mKATE2 under the control of Ptac promoter. This DNA fragment was amplified by PCR from a plasmid encoding mKATE2 (Shcherbo, et al., 2009) with oligonucleotides **8** and **32**, digested with *BamHI-SpeI* and cloned into the same sites of pGEC\_ *fimEcN\_gfp*.

**pGECmatEcN\_gfp:** This pGEC-derivative was constructed by simultaneous cloning of these three fragments: (i) the homologous region HR1-*mat*, amplified by PCR from EcN total DNA with the oligonucleotides **33** and **34** and digested with *XhoI-SacI*; (ii) Ptac-gfp,

obtained as a *SacI-SpeI* digested fragment from plasmid pGEC*fluEcN\_gfp*; and, (iii) the homologous region HR2-*mat*, amplified by PCR from EcN total DNA with the oligonucleotides **35** and **36** and digested with *SpeI-SphI*. The three DNA fragments were simultaneously ligated into the *XhoI/SphI* sites of pGEC.

**pGEC*matEcN\_lux***: GeneBank MZ361919. It is pGEC-derivative containing a 5,978 bp *SacI/SpeI* DNA fragment containing the *luxCDABE* operon of *Photobacterium luminescens* under the control of the P<sub>2</sub> constitutive promoter isolated from pGEC*mat-lux* (Piñero-Lambea, et al., 2015) and cloned in the same restriction sites of pGEC*matEcN\_gfp*, replacing *Ptac-gfp* by P<sub>2</sub>.*luxCDABE*.

**pGEC\_ *tetR*-Ptet-*flhDC***: GeneBank MZ361920. This pGEC-derivative was constructed in two steps. The first step was the simultaneous cloning of two DNA fragments into pGEC digested with *XhoI-XbaI*: (i) the homologous region HR1-*flhD*, amplified by PCR from EcN total DNA with oligonucleotides **37** and **38** digested with *XhoI-SacI*; (ii) TetR\_Ptet DNA synthesis fragment of 853 bp (GeneArt, Thermo Fisher Scientific) with flanking *SacI-XbaI* sites and digested with these enzymes. In a second step, the homologous region HR2-*flhD*, amplified by PCR from EcN total DNA with oligonucleotides **39** and **40**, was cloned into the *XbaI-SphI* restriction sites of the resultant plasmid.

**pGECΔ*flhDC***: GeneBank MZ361921. This pGEC-derivative was obtained by cloning the homologous region HR3-*flhDC*, amplified by PCR from EcN total DNA with oligonucleotides **41** and **42** and digested with *SacI-SphI* into the same sites of pGEC\_ *tetR*-Ptet-*flhDC*.

### ***E. coli* Nissle1917 strain constructions**

**EcNΔ*flu\_gfp***: Strain obtained by conjugation of the recipient EcN carrying pACBSR (Cm<sup>R</sup>) with the donor MFDpir carrying the plasmid pGEC*fluEcN\_gfp* (Km<sup>R</sup>). Cointegrants, selected with Cm and Km, were resolved by I-SceI endonuclease expression and individual colonies were checked by PCR with oligonucleotides **1** and **2** for *flu* upstream integration and oligonucleotides **3** and **4** for *flu* downstream integration.

**EcNΔ*fim\_gfp***: Strain obtained by conjugation of recipient EcN carrying pACBSR (Cm<sup>R</sup>) with the donor MFDpir carrying the plasmid pGEC*fimEcN\_gfp* (Km<sup>R</sup>). Cointegrants, selected with Cm and Km, were resolved by I-SceI endonuclease expression and individual colonies were checked by PCR with oligonucleotides **5** and **2** for *fim* upstream integration and oligonucleotides **3** and **6** for *fim* downstream integration.

**EcN $\Delta$ *fim\_mKATE2***: Strain obtained by conjugation of the recipient EcN carrying pACBSR (Cm<sup>R</sup>) with the donor MFDpir carrying the plasmid pGEC*fim*EcN\_*mKATE2* (Km<sup>R</sup>). Cointegrants, selected with Cm and Km, were resolved by I-SceI endonuclease expression and individual colonies were checked by PCR with oligonucleotides **5** and **7** for *fimAICDFGH* upstream integration and oligonucleotides **8** and **6** for *fimAICDFGH* downstream integration.

**EcN $\Delta$ *mat\_lux***: Strain obtained by conjugation of the recipient EcN carrying pACBSR (Cm<sup>R</sup>) with the donor MFDpir carrying the plasmid pGEC*mat*EcN\_*lux* (Km<sup>R</sup>). Cointegrants, selected with Cm and Km, were resolved by I-SceI endonuclease expression and individual colonies were checked by PCR with oligonucleotides **9** and **10** for *ecpA* upstream integration and oligonucleotides **11** and **12** for *ecpA* downstream integration. Positive clones were tested for light emission.

**EcN\_P<sub>tet</sub>-*flhDC***: Strain obtained by conjugation of the recipient EcN carrying pACBSR (Cm<sup>R</sup>) with the donor MFDpir carrying the plasmid pGEC\_*tetR*-Ptet-*flhDC* (Km<sup>R</sup>). Cointegrants, selected with Cm and Km, were resolved by I-SceI endonuclease expression and individual colonies were checked by PCR with oligonucleotides **13** and **14** for upstream integration and oligonucleotides **15** and **16** for downstream integration.

**EcN $\Delta$ *flhDC***: Strain obtained by conjugation of the recipient EcN carrying pACBSR (Cm<sup>R</sup>) with the donor MFDpir carrying the plasmid pGEC $\Delta$ *flhDC* (Km<sup>R</sup>). Cointegrants, selected with Cm and Km, were resolved by I-SceI endonuclease expression and individual colonies were checked by PCR with oligonucleotides **13** and **17** to select the deletion of *flhDC* operon.

**EcN $\Delta$ *fim\_mKATE2*  $\Delta$ *mat\_lux***: Strain obtained by conjugation of the recipient EcN $\Delta$ *fim\_mKATE2* carrying pACBSR (Cm<sup>R</sup>) with the donor MFDpir carrying the plasmid pGEC*mat*EcN\_*lux* (Km<sup>R</sup>). Cointegrants, selected with Cm and Km, were resolved by I-SceI endonuclease expression and individual colonies were checked by PCR with oligonucleotides **9** and **10** for *ecpA* upstream integration and oligonucleotides **11** and **12** for *ecpA* downstream integration. Positive clones were tested for light emission.

**EcN $\Delta$ *fim\_mKATE2*  $\Delta$ *mat\_lux* P<sub>tet</sub>-*flhDC***: Strain obtained by conjugation of the recipient EcN $\Delta$ *fim\_mKATE2*  $\Delta$ *mat\_lux* carrying pACBSR (Cm<sup>R</sup>) with the donor MFDpir carrying the plasmid pGEC\_*tetR*-Ptet-*flhDC* (Km<sup>R</sup>). Cointegrants, selected with Cm and Km, were resolved by I-SceI endonuclease expression and individual colonies were checked by PCR with oligonucleotides **13** and **14** for *ecpA* upstream integration and oligonucleotides **15** and **16** for *ecpA* downstream integration.

## Bioinformatic analysis of whole genome sequencing data

The quality of the FASTQfiles was analyzed using FastQC v0.11.5 (Andrews, 2010). FastQ Screen v0.14.1 (Wingett and Andrews, 2018) did not detect unexpected contamination with foreign genomic material. Fastp software (Chen, et al., 2018) was applied to remove final poly-Gs of length 12 nt or more, and to filter out reads of less than 50 nt long. Filtered sequences of both samples were aligned with BWA sampe (version 0.7.17) (Li and Durbin, 2010) against the assembly ASM71459v1 (GenBank sequence CP007799.1) for *Escherichia coli* strain Nissle 1917 with default parameters. Most of the reads were mapped to the reference genome and the mean coverage was around 600 and distributed evenly, with more than 98% of the genome covered by 50 or more reads. Samtools version 1.11 (Li, et al., 2009) was used to compress the alignment files (SAM to BAM format), sort by coordinates and index the files. Optical duplicated reads were removed using Picard MarkDuplicates version 2.18.26-SNAPSHOT (<http://broadinstitute.github.io/picard/>). Statistics and quality of the alignments were assessed for all samples with Qualimap (Okonechnikov, et al., 2016) software (version v.2.2.1), samtools options flagstats and idxstats and bcftools (version 2.4.0) option stats. Mapped reads (without optical duplicates) of strain\_118 and strain\_185 were the input of the freebayes (Garrison and Marth, 2012) variant caller to extract SNP, INDEL, multiple nucleotide polymorphism (MNP) and other more complex events, with arguments - -pooled-continuous, that also considers alternative models different from haploid, and -C=5, that filters out detected callings having less than 5 reads supporting the variant allele. In addition, vcf-filter (Garrison, et al., 2021) with -Q>20 was used to keep only variants having a probability that the site has a real variant (QUAL) of 20 or more. The resulting multisample variant calling file (VCF) was annotated using SnpEff (Cingolani, et al., 2012) version 4.3t, with the option -ud 500 and using a built database for *Escherichia coli* strain Nissle 1917. CNVseq (Xie and Tammi, 2009) was used to extract Copy Number Variation (CNV) between samples. The result was a set of three differential CNVs that match with the regions where the three insertions were placed although the borders of the deletions were not precisely defined. Deleted regions in the modified strain were independently evaluated by bedtools genomecov (Quinlan and Hall, 2010) with parameters -bga -split plus grep filtering used on the BAM alignment files to obtain the regions having no coverage of reads in each of the two samples. Inspection of these genomic regions with the genomic browser IGV (Thorvaldsdóttir, et al., 2013) showed only three reliable deletions in the modified strain 185 and none in parental strain 118. The three detected deletions were almost identical (within 1 to 3 bp difference) to those expected by the gene replacements in the modified strain (Supporting Data 1).

These small border differences are due to limitations of the bioinformatic assembly tools but do not represent actual variants in the genome of the modified strain.

To check the existence of possible variants in the inserted regions of sample 185, respect to the expected sequence of the inserts, an additional variant calling analysis was performed (with the same parameters as described above) aligning the filtered FASTQ sequences of sample 185 against an artificial reference file containing the FASTA sequences of the three regions inserted (*tetR-P<sub>tet</sub>-flhDC*, *P2-lux*, and *Ptac-mKATE*), plus 100 nt upstream and downstream of the inserts. Results of this variant calling analysis are shown in Supporting Data 1.

### Supporting References

Andrews, S. (2010) FastQC: a quality control tool for high throughput sequence data. Online at: <http://www.bioinformatics.babraham.ac.uk/projects/fastqc>.

Chen, S., Zhou, Y., Chen, Y., and Gu, J. (2018) fastp: an ultra-fast all-in-one FASTQ preprocessor, *Bioinformatics* **34**: i884-i890.

Cingolani, P., Platts, A., Wang, L.L., Coon, M., Nguyen, T., Wang, L., et al. (2012) A program for annotating and predicting the effects of single nucleotide polymorphisms, SnpEff: SNPs in the genome of *Drosophila melanogaster* strain w1118; iso-2; iso-3, *Fly (Austin)* **6**: 80-92.

Corcoran, C.P., Cameron, A.D., and Dorman, C.J. (2010) H-NS silences *gfp*, the green fluorescent protein gene: *gfpTCD* is a genetically remastered *gfp* gene with reduced susceptibility to H-NS-mediated transcription silencing and with enhanced translation, *J Bacteriol* **192**: 4790-4793.

Datsenko, K.A., and Wanner, B.L. (2000) One-step inactivation of chromosomal genes in *Escherichia coli* K-12 using PCR products, *Proc Natl Acad Sci U S A* **97**: 6640-6645.

Ferrières, L., Hémerly, G., Nham, T., Guerout, A.M., Mazel, D., Beloin, C., and Ghigo, J.M. (2010) Silent mischief: bacteriophage Mu insertions contaminate products of *Escherichia coli* random mutagenesis performed using suicidal



transposon delivery plasmids mobilized by broad-host-range RP4 conjugative machinery, *J Bacteriol* **192**: 6418-6427.

Garrison, E., Kronenberg, Z.N., Dawson, E.T., Pedersen, B.S., and Prins, P. (2021) Vcfliib and tools for processing the VCF variant call format, *bioRxiv*: 2021.2005.2021.445151.

Garrison, E., and Marth, G. (2012) Haplotype-based variant detection from short-read sequencing. arXiv:1207.3907v1202.

Herring, C.D., Glasner, J.D., and Blattner, F.R. (2003) Gene replacement without selection: regulated suppression of amber mutations in *Escherichia coli*, *Gene* **311**: 153-163.

Li, H., and Durbin, R. (2010) Fast and accurate long-read alignment with Burrows-Wheeler transform, *Bioinformatics* **26**: 589-595.

Li, H., Handsaker, B., Wysoker, A., Fennell, T., Ruan, J., Homer, N., et al. (2009) The Sequence Alignment/Map format and SAMtools, *Bioinformatics* **25**: 2078-2079.

Martinez-Garcia, E., Aparicio, T., Goni-Moreno, A., Fraile, S., and de Lorenzo, V. (2015) SEVA 2.0: an update of the Standard European Vector Architecture for de-/re-construction of bacterial functionalities, *Nucleic Acids Res* **43**: D1183-1189.

Okonechnikov, K., Conesa, A., and García-Alcalde, F. (2016) Qualimap 2: advanced multi-sample quality control for high-throughput sequencing data, *Bioinformatics (Oxford, England)* **32**: 292-294.

Piñero-Lambea, C., Bodelón, G., Fernández-Periáñez, R., Cuesta, A.M., Álvarez-Vallina, L., and Fernández, L.A. (2015) Programming Controlled Adhesion of *E. coli* to Target Surfaces, Cells, and Tumors with Synthetic Adhesins, *ACS synthetic biology* **4**: 463-473.

Quinlan, A.R., and Hall, I.M. (2010) BEDTools: a flexible suite of utilities for comparing genomic features, *Bioinformatics* **26**: 841-842.

Ruano-Gallego, D., Álvarez, B., and Fernández, L.Á. (2015) Engineering the Controlled Assembly of Filamentous Injectisomes in *E. coli* K-12 for Protein Translocation into Mammalian Cells, *ACS synthetic biology* **4**: 1030-1041.

Shcherbo, D., Murphy, C.S., Ermakova, G.V., Solovieva, E.A., Chepurnykh, T.V., Shcheglov, A.S., et al. (2009) Far-red fluorescent tags for protein imaging in living tissues, *Biochem J* **418**: 567-574.

Thorvaldsdóttir, H., Robinson, J.T., and Mesirov, J.P. (2013) Integrative Genomics Viewer (IGV): high-performance genomics data visualization and exploration, *Briefings in bioinformatics* **14**: 178-192.

Wingett, S.W., and Andrews, S. (2018) FastQ Screen: A tool for multi-genome mapping and quality control, *F1000Res* **7**: 1338-1338.

Xie, C., and Tammi, M.T. (2009) CNV-seq, a new method to detect copy number variation using high-throughput sequencing, *BMC Bioinformatics* **10**: 80.

## Supporting Figures

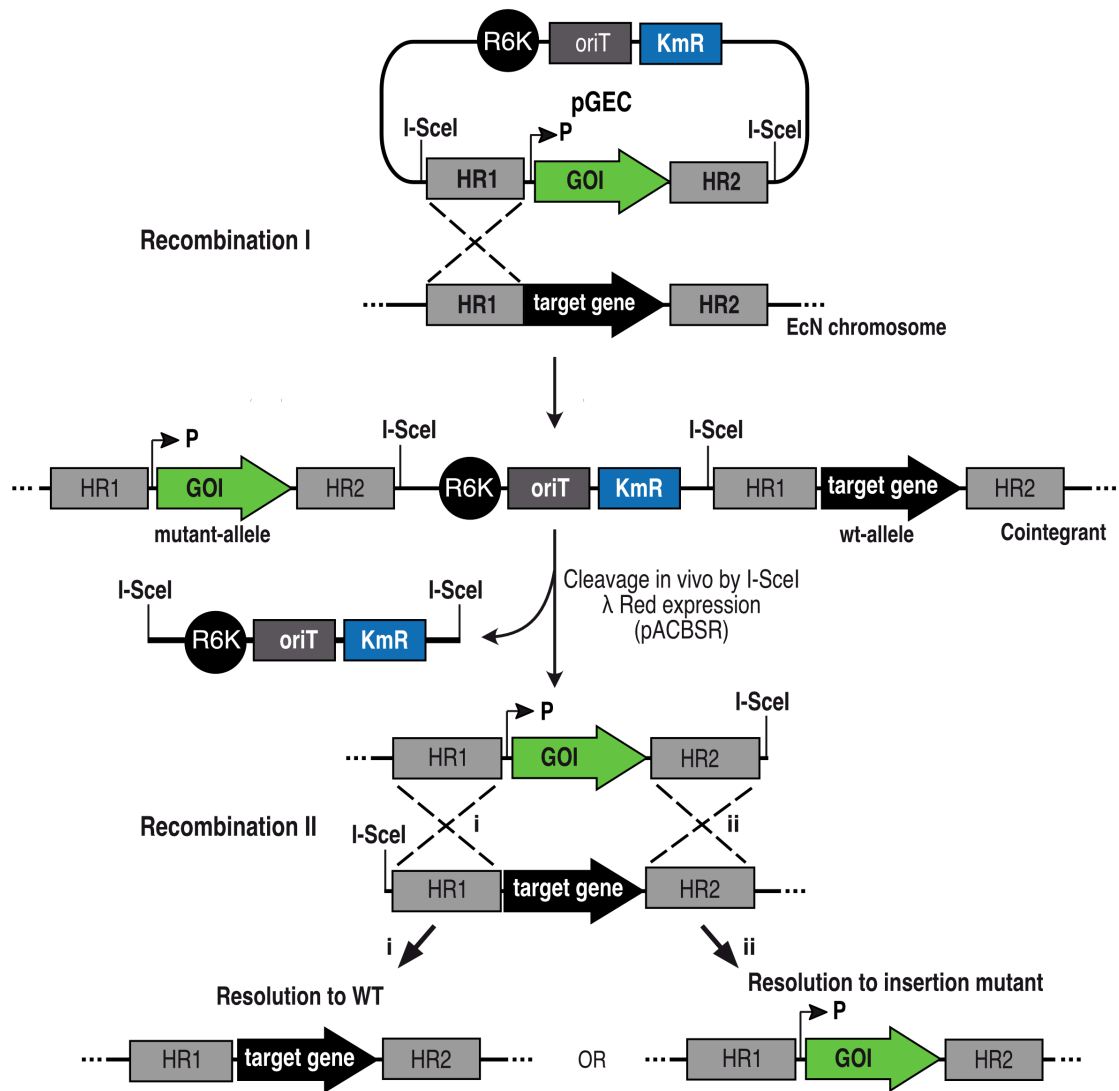

**Fig. S1. Site-specific markerless integration in *EcN* chromosome.** Scheme showing the integration of a gene of interest (GOI) under the control of a promoter (P) in the *EcN* chromosome using a suicide conjugative plasmid pGEC derivative containing the origin of transfer (*oriT*), the replication origin R6K, the Km<sup>R</sup> gene, and the GOI flanked by two homologous regions (HR1 and HR2) corresponding to regions located upstream and downstream of the target gene. The cassette formed by the GOI and the HRs is flanked by two I-SceI restriction sites. The first recombination event (Recombination I) leads to the cointegrants obtaining which are further resolved by the expression of the I-SceI endonuclease and the λ Red protein from the helper plasmid pACBSR. Double strand breaks generated by the I-SceI endonuclease are repaired a second homologous recombination event (Recombination II) assisted by the λ Red protein that may produce either the wild type allele (i) or the insertion mutant (ii).

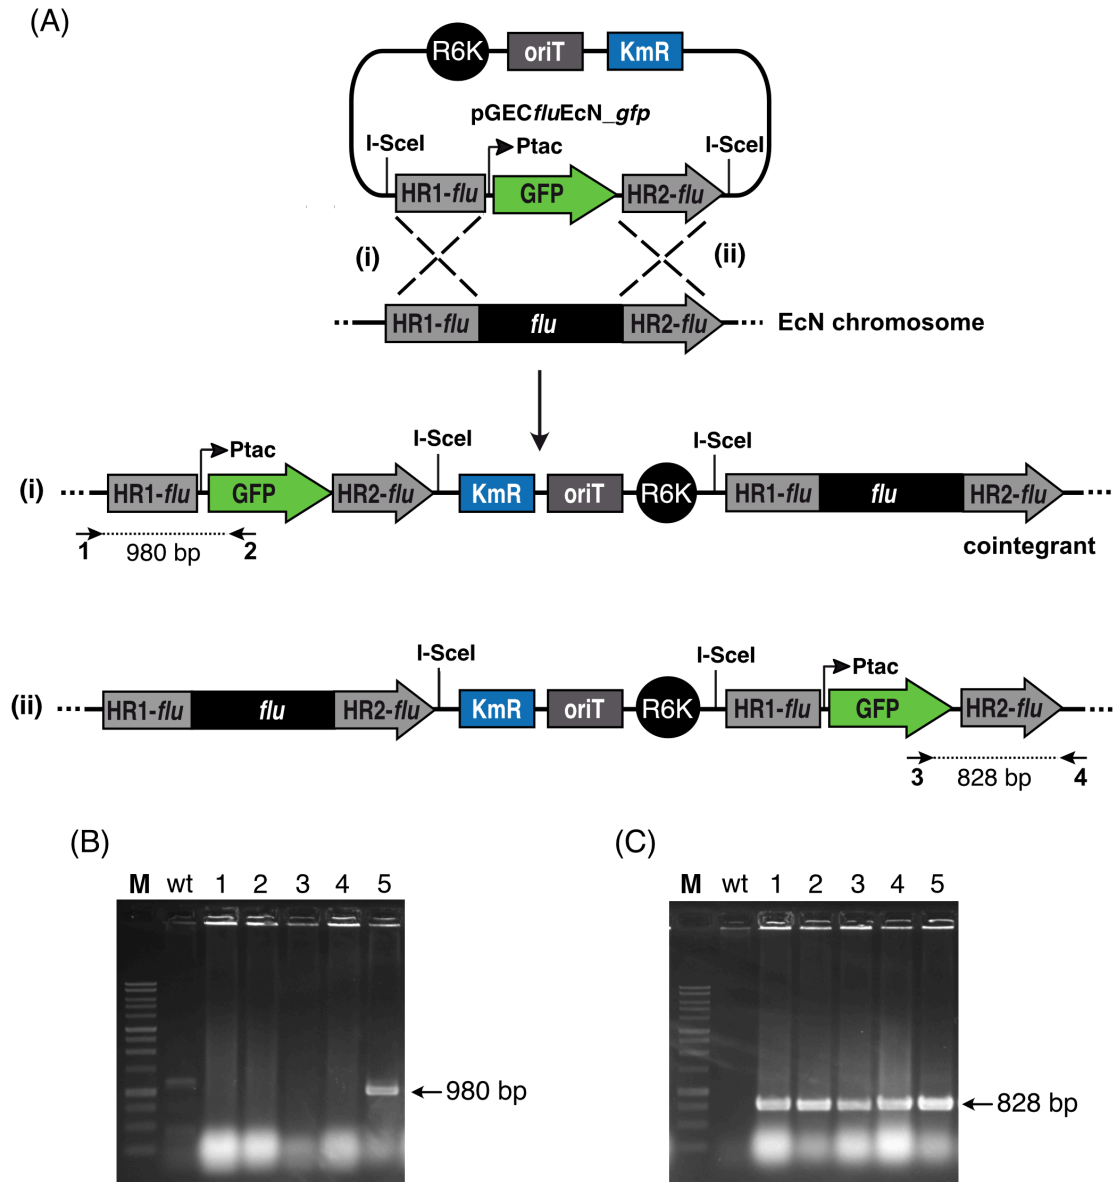

**Fig. S2. PCR analysis of *flu*\_Ptac-*gfp* cointegrants.**

A. Scheme showing that cointegrants can be generated after homologous recombination using HR1-*flu* (i) or HR2-*flu* (ii).

B-C. Colony PCR of five cointegrants using primer oligonucleotides 1 and 2 to check homologous recombination with HR1-*flu* (B) or with oligonucleotides 3 and 4 to check homologous recombination with HR2-*flu* (C). PCR of EcN wt colony was used as negative control in both panels B and C.

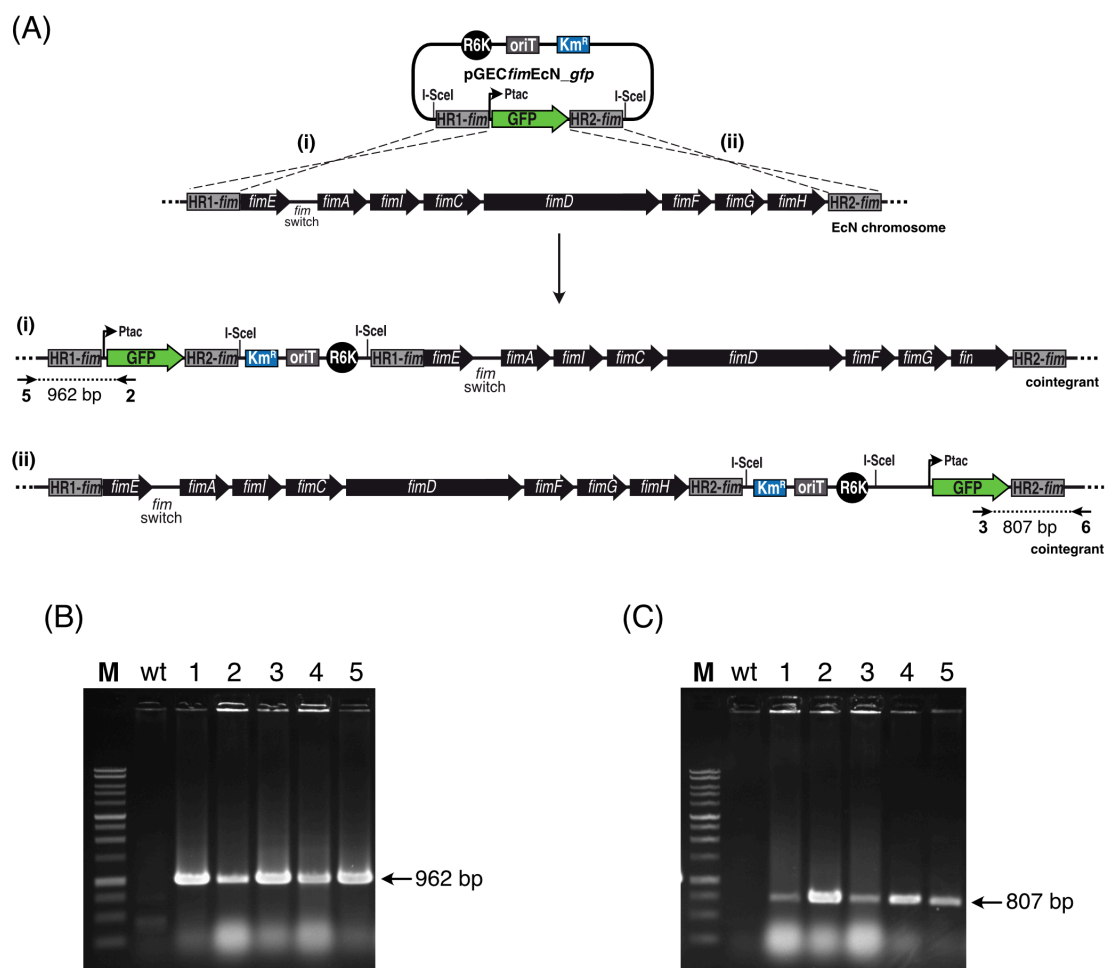

**Fig. S3. PCR analysis of *fim*\_Ptac-*gfp* cointegrants.**

A. Scheme showing that cointegrants can be generated after homologous recombination using HR1-*fim* (i) or HR2-*fim* (ii).

B-C. Colony PCR of five cointegrants using primer oligonucleotides 5 and 2 to check homologous recombination with HR1-*fim* (B) or with oligonucleotides 3 and 6 to check homologous recombination with HR2-*fim* (C). PCR of EcN wt colony was used as negative control in both panels B and C.

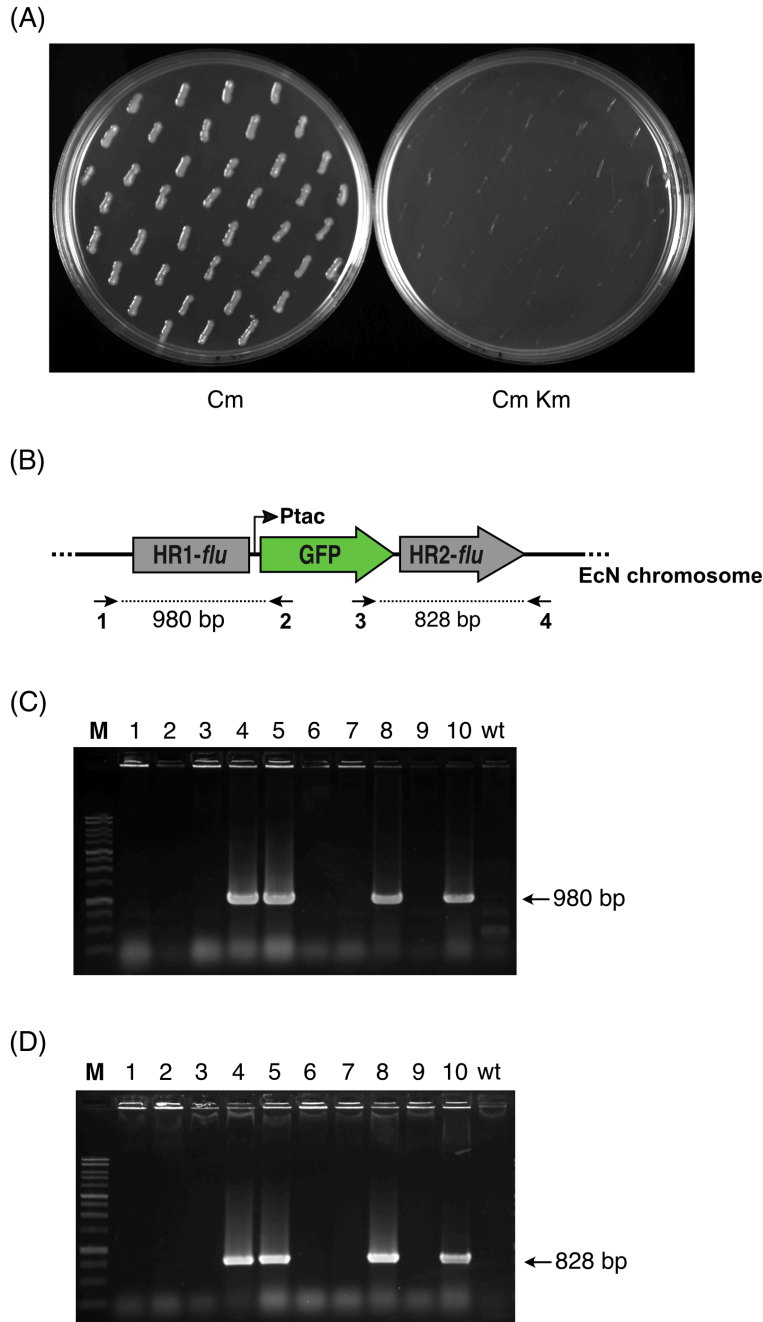

**Fig. S4. PCR analysis of the resolution of *flu*\_Ptac-*gfp* cointegrants.**

A. Replica plating of 40 colonies randomly picked after resolution of EcN *flu*\_Ptac-*gfp* cointegrants using LB Cm plates, with and without Km, to check the loss of Km resistance.

B. Scheme of the cointegrants resolved to the Ptac-*gfp* insertion.

C-D. Colony PCR of 10 colonies sensitive to Km with oligonucleotides 1 and 2 to check the insertion Ptac-*gfp* using the upstream region of *flu* locus (C) or with oligonucleotides 3 and 4 to check the insertion using the downstream region of *flu* locus (D). PCR of EcN wt colony was used as negative control in both panels C and D.

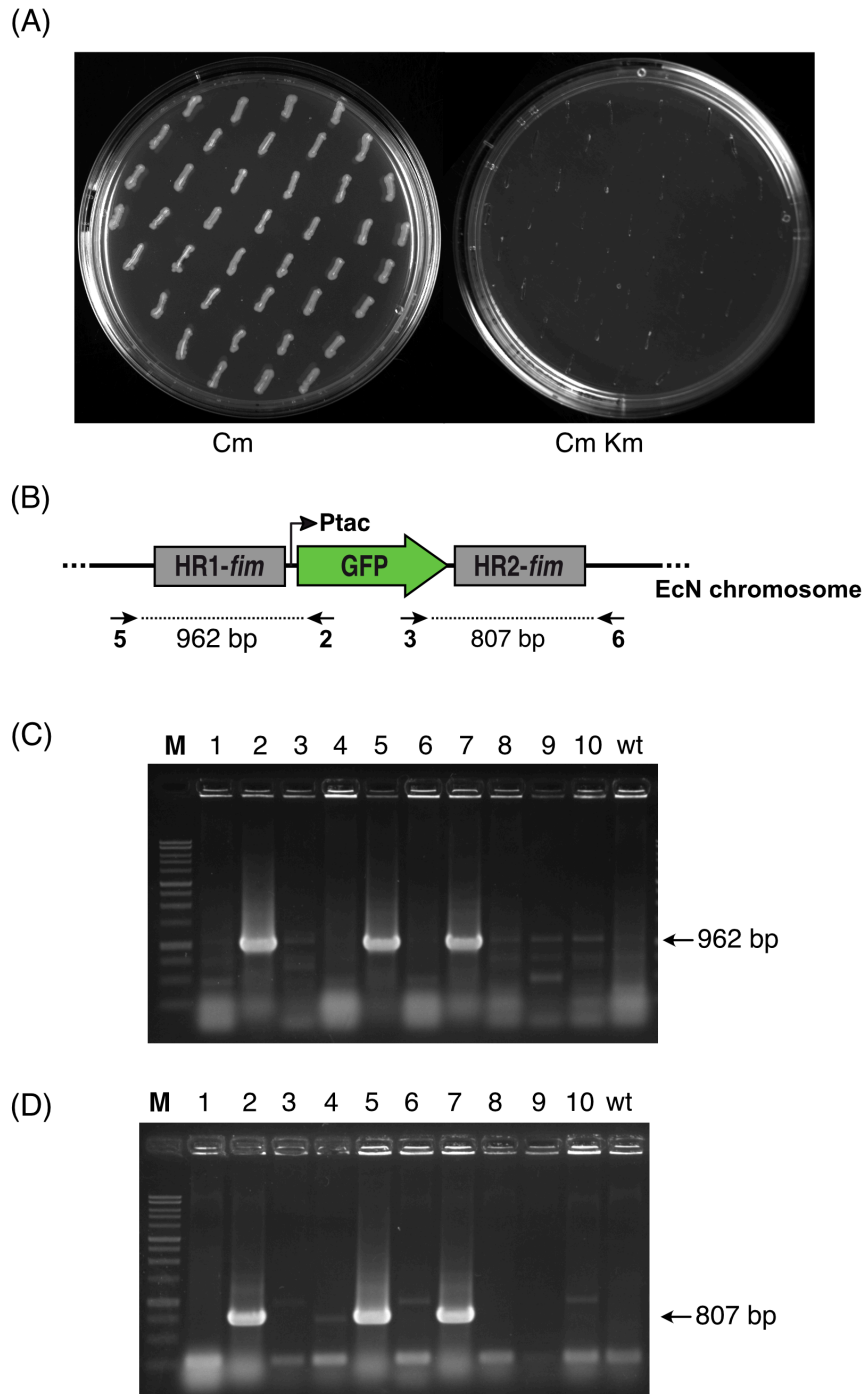

**Fig. S5. PCR analysis of the resolution of *fim*\_Ptac-*gfp* cointegrants.**

A. Replica plating of 40 colonies randomly picked after resolution of EcN *fim*\_Ptac-*gfp* cointegrants using LB Cm plates, with and without Km, to check the loss of Km resistance.

B. Scheme of the cointegrants resolved to the Ptac-*gfp* insertion.

C-D. Colony PCR of 10 colonies sensitive to Km with oligonucleotides 5 and 2 to check the insertion Ptac-*gfp* using the upstream region of *fim* locus (C) or with oligonucleotides 3 and 6 to check the insertion using the downstream region of *fim* locus (D). PCR of EcN wt colony was used as negative control in both panels C and D.

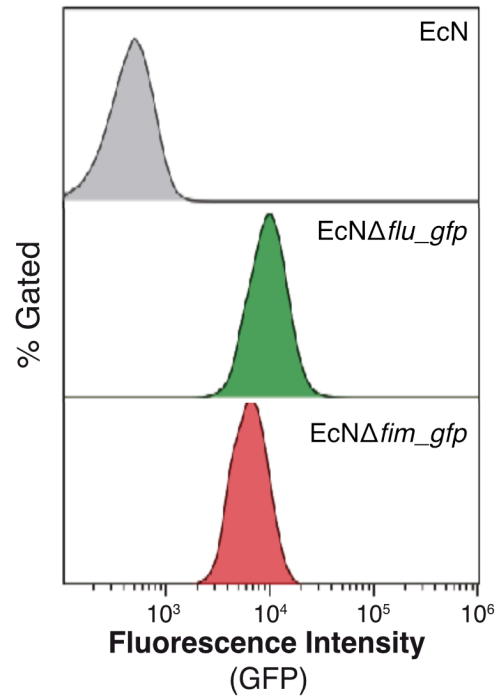

**Fig. S6. Expression of GFP in *EcNΔflu\_Ptac-gfp* and *EcNΔfim\_Ptac-gfp* cointegrants.** Flow cytometry analysis of *EcN* wild type bacteria (*EcN*) and derivative strains *EcNΔflu\_gfp* and *EcNΔfim\_gfp* carrying insertion of *Ptac-gfp* replacing *flu* or *fim* locus. Bacteria were harvested from cultures of the corresponding strain in LB with IPTG 0.1 mM.



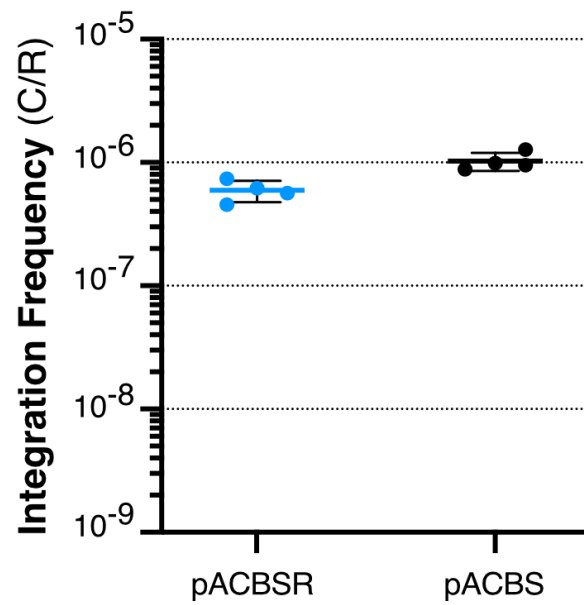

**Fig. S7. Integration frequency of pGEC*fim*EcN\_ *gfp* in EcN carrying pACBSR or pACBS.** Frequencies are calculated as the ratio of cointegrants (C) vs. recipients (R). Horizontal lines indicate means of four independent assays (n=4). Vertical bars indicated standard deviation. Plasmid pACBS lacks the  $\lambda$ Red genes found in pACBSR.

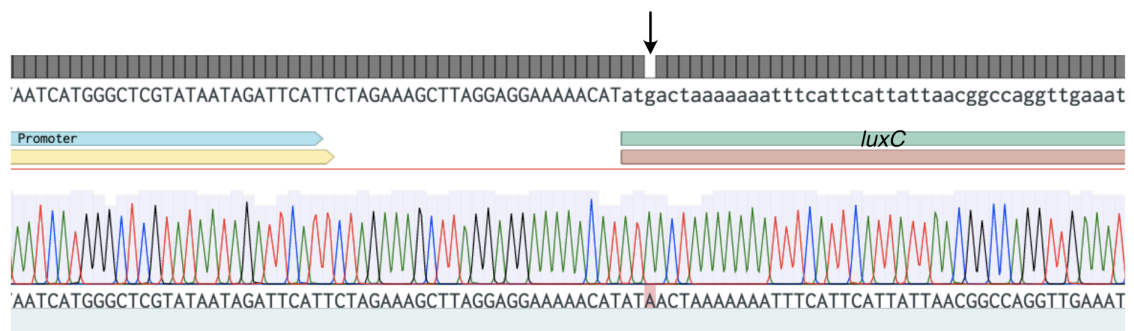

**Fig. S8. DNA Sanger sequencing of the plasmid preparation of pGEC\_*matEcN-lux* used for integration of *lux* operon in *EcN*. The mutated nucleotide (G to A) in the start codon of *luxC* gene is labelled with an arrow.**
